# Supplementary material
Source: Springer Nature journal article supplement (https://www.springermedizin.de/resource/supplementary/12913_2013_3396_MOESM2_ESM.pdf/9532710)
Supplement: MOESM2 [file 9532710]

## Supplementary online file

### Summary of key findings by country

| Topic                                                                                    | Malawi (n=14)                                                                                                                                      | Mali (n=7)                                                                                                                                            | Rwanda (n=7)                                                                                                                              | Uganda (n=11)                                                                                                                         |
|------------------------------------------------------------------------------------------|----------------------------------------------------------------------------------------------------------------------------------------------------|-------------------------------------------------------------------------------------------------------------------------------------------------------|-------------------------------------------------------------------------------------------------------------------------------------------|---------------------------------------------------------------------------------------------------------------------------------------|
| <b>Facilities targeted for KMC implementation</b>                                        | <ul style="list-style-type: none"> <li>All districts, with focus on district hospitals and community health centres</li> </ul>                     | <ul style="list-style-type: none"> <li>Regional and district hospitals</li> </ul>                                                                     | <ul style="list-style-type: none"> <li>All district hospitals, as part of the neonatology outreach</li> </ul>                             | <ul style="list-style-type: none"> <li>Varied, depending on districts targeted for newborn care training</li> </ul>                   |
| <b>Existence of national KMC guidelines</b>                                              | <ul style="list-style-type: none"> <li>Yes</li> </ul>                                                                                              | <ul style="list-style-type: none"> <li>Incorporated in newborn care guidelines</li> </ul>                                                             | <ul style="list-style-type: none"> <li>Yes</li> </ul>                                                                                     | <ul style="list-style-type: none"> <li>Incorporated in newborn care guidelines</li> </ul>                                             |
| <b>Location of KMC services at the health facility</b>                                   | <ul style="list-style-type: none"> <li>Services mostly provided as part of postnatal care</li> <li>Separate KMC room: 11/14</li> </ul>             | <ul style="list-style-type: none"> <li>Services provided as part of postnatal, paediatric or neonatal care</li> <li>Separate KMC room: 4/7</li> </ul> | <ul style="list-style-type: none"> <li>Services provided as part of maternity or neonatal care</li> <li>Separate KMC room: 7/7</li> </ul> | <ul style="list-style-type: none"> <li>Services mostly provided as part of postnatal care</li> <li>Separate KMC room: 6/11</li> </ul> |
| <b>Availability of KMC education materials</b>                                           | <ul style="list-style-type: none"> <li>Posters: 11/14; Murals: 2/14; Leaflets: 1/14; Counselling cards: 3/14; Photocopies on wall: 1/14</li> </ul> | <ul style="list-style-type: none"> <li>None</li> </ul>                                                                                                | <ul style="list-style-type: none"> <li>Photocopies on wall: 1/7</li> </ul>                                                                | <ul style="list-style-type: none"> <li>Posters by donors: 7/11; Own posters: 2/11</li> </ul>                                          |
| <b>Awareness of KMC being promoted in antenatal care services</b>                        | <ul style="list-style-type: none"> <li>6/14</li> </ul>                                                                                             | <ul style="list-style-type: none"> <li>1/7</li> </ul>                                                                                                 | <ul style="list-style-type: none"> <li>0/7</li> </ul>                                                                                     | <ul style="list-style-type: none"> <li>3/11</li> </ul>                                                                                |
| <b>Promotion of intermittent KMC for babies not yet admitted for continuous KMC</b>      | <ul style="list-style-type: none"> <li>9/14. No facilities have a set schedule or recording system</li> </ul>                                      | <ul style="list-style-type: none"> <li>2/7. No facilities have a set schedule or recording system</li> </ul>                                          | <ul style="list-style-type: none"> <li>3/7. No facilities have a set schedule or recording system</li> </ul>                              | <ul style="list-style-type: none"> <li>6/11. No facilities have a set schedule, 2 facilities recorded hours per day in KMC</li> </ul> |
| <b>Written policy for feeding low birth weight babies</b>                                | <ul style="list-style-type: none"> <li>3/14</li> </ul>                                                                                             | <ul style="list-style-type: none"> <li>4/7</li> </ul>                                                                                                 | <ul style="list-style-type: none"> <li>Incorporated in national neonatal protocols</li> <li>Available: 7/7</li> </ul>                     | <ul style="list-style-type: none"> <li>3/11</li> </ul>                                                                                |
| <b>Monitors' impression of the quality of documentation (availability, completeness)</b> | <ul style="list-style-type: none"> <li>Good: 4</li> <li>Average: 6</li> <li>Poor: 4</li> </ul>                                                     | <ul style="list-style-type: none"> <li>Good: 2</li> <li>Average: 4</li> <li>Poor: 1</li> </ul>                                                        | <ul style="list-style-type: none"> <li>Good: 2</li> <li>Average: 5</li> <li>Poor: 0</li> </ul>                                            | <ul style="list-style-type: none"> <li>Good: 1</li> <li>Average: 6</li> <li>Poor: 4</li> </ul>                                        |

|                                                               |                                                                        |                                                                        |                                                                        |                                                                        |
|---------------------------------------------------------------|------------------------------------------------------------------------|------------------------------------------------------------------------|------------------------------------------------------------------------|------------------------------------------------------------------------|
| <b>Availability of KMC register</b>                           | • 10/14                                                                | • 7/7                                                                  | • 5/7                                                                  | • 7/11                                                                 |
| <b>Number of staff trained in KMC</b>                         | • Total: 780<br>• In facilities visited: 238<br>(range 0-155)          | • Total: Unknown<br>• In facilities visited: 142<br>(range 2-71)       | • Total: 501<br>• In facilities visited: 60<br>(range 3-14)            | • Total: Unknown<br>• In facilities visited: 262<br>(range 1-60)       |
| <b>KMC orientation for new staff</b>                          | • 3/14                                                                 | • 2/7                                                                  | • 6/7                                                                  | • 5/11                                                                 |
| <b>Evidence of follow-up system (documentation, schedule)</b> | • Good evidence: 3<br>• Partial evidence: 9<br>• Little/no evidence: 2 | • Good evidence: 4<br>• Partial evidence: 3<br>• Little/no evidence: 0 | • Good evidence: 5<br>• Partial evidence: 2<br>• Little/no evidence: 0 | • Good evidence: 4<br>• Partial evidence: 2<br>• Little/no evidence: 5 |

### Expanded table of key findings from hospitals visited

| Topic                                            | Malawi                                                                                                                                                                                         | Mali                                                                                                                                                                | Rwanda                                                                                          | Uganda                                                                                                                                                                                          |
|--------------------------------------------------|------------------------------------------------------------------------------------------------------------------------------------------------------------------------------------------------|---------------------------------------------------------------------------------------------------------------------------------------------------------------------|-------------------------------------------------------------------------------------------------|-------------------------------------------------------------------------------------------------------------------------------------------------------------------------------------------------|
| Facilities targeted for implementation           | • All health facilities:<br>District hospitals and selected community health centres<br>Central and mission hospitals                                                                          | • Regional and district hospitals as funding and buy-in allowed                                                                                                     | • All district hospitals                                                                        | • Eclectic, depending on districts targeted for newborn care training                                                                                                                           |
| National KMC guidelines                          | • Yes                                                                                                                                                                                          | • Incorporated in newborn care guidelines                                                                                                                           | • Yes                                                                                           | • Incorporated in newborn care guidelines                                                                                                                                                       |
| Number, location and types of facilities visited | • 14 visited<br>• All levels<br>• All 3 regions<br>• Breakdown:<br>1 central teaching hospital<br>9 district hospitals<br>1 mission hospital<br>1 rural hospital<br>2 community health centres | • 7 visited<br>• All levels<br>• 3 regions in south of country<br>• Breakdown:<br>• 1 central teaching hospital<br>• 3 regional hospitals<br>• 3 district hospitals | • 7 visited<br>• District level only<br>• 4/5 provinces<br>• Breakdown:<br>7 district hospitals | • 11 visited<br>• All levels<br>• 4/9 regions<br>• Breakdown:<br>1 central teaching hospital<br>1 regional hospital<br>4 district hospitals<br>3 no-for-profit hospitals<br>2 health centres IV |

| Topic                                                          | Malawi                                                                                                                                                                                                                                                                                                                                                                                                                                                                                                                                                                 | Mali                                                                                                                                                                                                                                                                                                                                                                                                                                                                                                                                                                 | Rwanda                                                                                                                                                                                                                                                                                                                                                                                                                                                                                                                                                                                       | Uganda                                                                                                                                                                                                                                                                                                                                                                                                                                                                                                                                                                                                                                                                                       |
|----------------------------------------------------------------|------------------------------------------------------------------------------------------------------------------------------------------------------------------------------------------------------------------------------------------------------------------------------------------------------------------------------------------------------------------------------------------------------------------------------------------------------------------------------------------------------------------------------------------------------------------------|----------------------------------------------------------------------------------------------------------------------------------------------------------------------------------------------------------------------------------------------------------------------------------------------------------------------------------------------------------------------------------------------------------------------------------------------------------------------------------------------------------------------------------------------------------------------|----------------------------------------------------------------------------------------------------------------------------------------------------------------------------------------------------------------------------------------------------------------------------------------------------------------------------------------------------------------------------------------------------------------------------------------------------------------------------------------------------------------------------------------------------------------------------------------------|----------------------------------------------------------------------------------------------------------------------------------------------------------------------------------------------------------------------------------------------------------------------------------------------------------------------------------------------------------------------------------------------------------------------------------------------------------------------------------------------------------------------------------------------------------------------------------------------------------------------------------------------------------------------------------------------|
| Baby-friendly Hospital Initiative in visited health facilities | <ul style="list-style-type: none"> <li>• 9/14 facilities designated as baby-friendly</li> <li>• Most obtained status for first time between 2004 and 2008</li> <li>• No subsequent re-assessments</li> </ul>                                                                                                                                                                                                                                                                                                                                                           | <ul style="list-style-type: none"> <li>• 4/7 claimed baby-friendly status</li> <li>• No recall of process or year of accreditation</li> <li>• No visible onsite evidence of baby-friendly status</li> </ul>                                                                                                                                                                                                                                                                                                                                                          | <ul style="list-style-type: none"> <li>• 0/7</li> <li>• One facility: preparations for assessment made</li> </ul>                                                                                                                                                                                                                                                                                                                                                                                                                                                                            | <ul style="list-style-type: none"> <li>• 1/11 facilities assessed 2005</li> <li>• 2/11 assessed end 2011 – no results at time of visit</li> </ul>                                                                                                                                                                                                                                                                                                                                                                                                                                                                                                                                            |
| Facilities                                                     | <ul style="list-style-type: none"> <li>• General vision and mission statement displayed: 3 district hospitals</li> <li>• Vision and mission statement for neonatal / maternity unit: Formulated: 0 facilities</li> <li>• Overnight facilities for mothers not yet doing KMC or doing intermittent KMC: 9/14<br/>Floor sleeping in some facilities</li> <li>• Location of KMC: Mostly part of maternity unit (linked to postnatal ward)</li> <li>• Separate KMC or side room: 11/14<br/>Rest: beds in postnatal ward</li> <li>• Number of dedicated KMC beds</li> </ul> | <ul style="list-style-type: none"> <li>• General vision and mission statement displayed: 0 facilities</li> <li>• Vision and mission statement for neonatal / maternity unit: Formulated: 0 facilities</li> <li>• Overnight facilities for mothers not yet doing KMC or doing intermittent KMC: 4/7<br/>Accommodation often conditional to space being available</li> <li>• Location of KMC: Part of postnatal, paediatric or neonatology wards</li> <li>• Separate KMC room: 4/7<br/>Rest: beds in postnatal ward</li> <li>• Number of dedicated KMC beds</li> </ul> | <ul style="list-style-type: none"> <li>• General vision and mission statement displayed: 0 facilities</li> <li>• Vision and mission statement for neonatal / maternity unit : Formulated: National neonatology guidelines<br/>Displayed: 0 facilities</li> <li>• Overnight facilities for mothers not yet doing KMC or doing intermittent KMC: 7/7<br/>Overcrowding in postnatal ward - mothers sharing beds</li> <li>• Location of KMC: Part of neonatology or combined maternity-neonatology services</li> <li>• Separate KMC room: 7/7</li> <li>• Number of dedicated KMC beds</li> </ul> | <ul style="list-style-type: none"> <li>• General vision, mission and value statement displayed: 5 hospitals</li> <li>• Vision and mission statement for neonatal / maternity unit: Formulated: 0 facilities</li> <li>• Overnight facilities for mothers not yet doing KMC or doing intermittent KMC: 11/11<br/>Floor sleeping in some facilities<br/>Use of maternity waiting house in one hospital</li> <li>• Location of KMC: Mostly part of maternity unit (linked to postnatal ward)</li> <li>• Separate KMC room: 6/11<br/>Two with space in postnatal ward and in a corridor separated by curtains<br/>Rest: beds in postnatal ward</li> <li>• Number of dedicated KMC beds</li> </ul> |

| Topic    | Malawi                                                                                                                                                                                                                                                                                                                                                                                                                                                                                                                                                                                                                                                   | Mali                                                                                                                                                                                                                                                                                                                                                                                                                                                                                                                                       | Rwanda                                                                                                                                                                                                                                                                                                                                                                                                                                                                                                                                                                                                              | Uganda                                                                                                                                                                                                                                                                                                                                                                                                                                                                                                                                                                            |
|----------|----------------------------------------------------------------------------------------------------------------------------------------------------------------------------------------------------------------------------------------------------------------------------------------------------------------------------------------------------------------------------------------------------------------------------------------------------------------------------------------------------------------------------------------------------------------------------------------------------------------------------------------------------------|--------------------------------------------------------------------------------------------------------------------------------------------------------------------------------------------------------------------------------------------------------------------------------------------------------------------------------------------------------------------------------------------------------------------------------------------------------------------------------------------------------------------------------------------|---------------------------------------------------------------------------------------------------------------------------------------------------------------------------------------------------------------------------------------------------------------------------------------------------------------------------------------------------------------------------------------------------------------------------------------------------------------------------------------------------------------------------------------------------------------------------------------------------------------------|-----------------------------------------------------------------------------------------------------------------------------------------------------------------------------------------------------------------------------------------------------------------------------------------------------------------------------------------------------------------------------------------------------------------------------------------------------------------------------------------------------------------------------------------------------------------------------------|
|          | <p>per facility:<br/>1-10 (mostly 3-7)</p> <ul style="list-style-type: none"> <li>• Continuous-KMC environment:<br/>KMC space: pleasant to cramped or unattractive<br/>Low beds: 7/14<br/>Comfortable chairs: 4/14<br/>Back rest or pillows for bed: 12/14<br/>Provision of linen: very few<br/>Storage space for mothers: very few</li> <li>• KMC educational materials:<br/>✓ Donor posters: 11<br/>✓ Own posters: 4<br/>✓ Murals: 2<br/>✓ Leaflets: 1<br/>✓ Counselling cards: 3<br/>✓ Photocopies on wall: 1</li> <li>• Food provided for mothers:<br/>All public hospitals, but not in all mission hospitals or community health centres</li> </ul> | <p>per facility:<br/>2-10</p> <ul style="list-style-type: none"> <li>• Continuous-KMC environment:<br/>KMC space: pleasant to cramped or unattractive<br/>Low beds: 7/7<br/>Comfortable chairs: 2/7<br/>Back rest or pillows for bed: 5/7<br/>Provision of linen: very few<br/>Storage space for mothers: very few</li> <li>• KMC educational materials:<br/>Donor posters: 0<br/>Own posters: 0<br/>Murals: 0<br/>Leaflets: 0<br/>Counselling cards: 0<br/>Photocopies on wall: 0</li> <li>• Food provided for mothers:<br/>No</li> </ul> | <p>per facility:<br/>0-8 (mostly 4-5<br/>In one facilities KMC provided in recliner chairs)</p> <ul style="list-style-type: none"> <li>• Continuous-KMC environment:<br/>KMC space: pleasant to cramped or unattractive<br/>Surgical beds: 7/7<br/>Comfortable chairs: 7/7<br/>Back rest or pillows for bed: 6/6<br/>Provision of linen: very few<br/>Storage space for mothers: very few</li> <li>• KMC educational materials:<br/>Donor posters: 0<br/>Own posters: 0<br/>Murals: 0<br/>Leaflets: 0<br/>Counselling cards: 0<br/>✓ Photocopies on wall: 1</li> <li>• Food provided for mothers:<br/>No</li> </ul> | <p>per facility:<br/>1-6</p> <ul style="list-style-type: none"> <li>• Continuous-KMC environment:<br/>KMC space: pleasant to cramped or unattractive<br/>Surgical beds: 8/8<br/>Comfortable chairs: 5/11<br/>Back rest or pillows for bed: 3/11<br/>Provision of linen: very few<br/>Storage space for mothers: very few</li> <li>• KMC educational materials:<br/>✓ Donor posters: 7<br/>✓ Own posters: 2<br/>Murals: 0<br/>Leaflets: 0<br/>Counselling cards: 0<br/>Photocopies on wall: 0</li> <li>• Food provided for mothers:<br/>Not in public health facilities</li> </ul> |
| Practice | <ul style="list-style-type: none"> <li>• Self-report on type of KMC provided:<br/>Intermittent: 9/11 hospitals<br/>“Continuous”: 14/14<br/>Verified continuous: 11/14</li> </ul>                                                                                                                                                                                                                                                                                                                                                                                                                                                                         | <ul style="list-style-type: none"> <li>• Self-report on type of KMC provided:<br/>Intermittent: 2/7<br/>“Continuous”: 7/7<br/>Verified continuous: Not established</li> </ul>                                                                                                                                                                                                                                                                                                                                                              | <ul style="list-style-type: none"> <li>• Self-report on type of KMC provided:<br/>Intermittent: 3/7<br/>“Continuous”: 7/7<br/>Verified continuous: Not established</li> </ul>                                                                                                                                                                                                                                                                                                                                                                                                                                       | <ul style="list-style-type: none"> <li>• Self-report on type of KMC provided:<br/>Intermittent: 6/9 hospitals<br/>“Continuous”: 8/11<br/>Verified continuous: 3/8</li> </ul>                                                                                                                                                                                                                                                                                                                                                                                                      |

| Topic | Malawi                                                                                                                                                                                                                                                                                                                                                                                                                                                                                                                                                                                                                                                                                                                                                                                                                                                                                                                                                                                                                                                        | Mali                                                                                                                                                                                                                                                                                                                                                                                                                                                                                                                                                                                                                                                                                                                                                                                                                                                                                                                                                                                                                                                 | Rwanda                                                                                                                                                                                                                                                                                                                                                                                                                                                                                                                                                                                                                                                                                                                                                                                                                                                                                                                                                                                                                                             | Uganda                                                                                                                                                                                                                                                                                                                                                                                                                                                                                                                                                                                                                                                                                                                                                                                                                                                                                                                                                                                                                                                  |
|-------|---------------------------------------------------------------------------------------------------------------------------------------------------------------------------------------------------------------------------------------------------------------------------------------------------------------------------------------------------------------------------------------------------------------------------------------------------------------------------------------------------------------------------------------------------------------------------------------------------------------------------------------------------------------------------------------------------------------------------------------------------------------------------------------------------------------------------------------------------------------------------------------------------------------------------------------------------------------------------------------------------------------------------------------------------------------|------------------------------------------------------------------------------------------------------------------------------------------------------------------------------------------------------------------------------------------------------------------------------------------------------------------------------------------------------------------------------------------------------------------------------------------------------------------------------------------------------------------------------------------------------------------------------------------------------------------------------------------------------------------------------------------------------------------------------------------------------------------------------------------------------------------------------------------------------------------------------------------------------------------------------------------------------------------------------------------------------------------------------------------------------|----------------------------------------------------------------------------------------------------------------------------------------------------------------------------------------------------------------------------------------------------------------------------------------------------------------------------------------------------------------------------------------------------------------------------------------------------------------------------------------------------------------------------------------------------------------------------------------------------------------------------------------------------------------------------------------------------------------------------------------------------------------------------------------------------------------------------------------------------------------------------------------------------------------------------------------------------------------------------------------------------------------------------------------------------|---------------------------------------------------------------------------------------------------------------------------------------------------------------------------------------------------------------------------------------------------------------------------------------------------------------------------------------------------------------------------------------------------------------------------------------------------------------------------------------------------------------------------------------------------------------------------------------------------------------------------------------------------------------------------------------------------------------------------------------------------------------------------------------------------------------------------------------------------------------------------------------------------------------------------------------------------------------------------------------------------------------------------------------------------------|
|       | <ul style="list-style-type: none"> <li>Reasons baby taken out of (continuous) KMC: <ul style="list-style-type: none"> <li>✓ Feeding (breast/cup)</li> <li>✓ Nappy change / clean baby</li> <li>✓ Mother meals</li> <li>✓ Mother toilet/bath</li> <li>Mother laundry</li> <li>Mother must go out</li> <li>✓ No guardian around</li> <li>✓ Mother tired</li> <li>Mother in pain</li> <li>✓ Reluctance of mother</li> </ul> </li> <li>Decision readiness for KMC: <ul style="list-style-type: none"> <li>Clinical Officer: 0</li> <li>Nurse(s): 14</li> <li>Joint CO &amp; nurse(s): 4</li> </ul> </li> <li>Awareness of KMC being promoted in antenatal care services: 6/14</li> <li>Transport to facility in KMC position: <ul style="list-style-type: none"> <li>Always 3</li> <li>Sometimes 7</li> <li>Seldom, never 3</li> <li>No experience 1</li> </ul> </li> <li>Transport from facility in KMC position: <ul style="list-style-type: none"> <li>Always 11</li> <li>Sometimes 2</li> <li>Seldom, never 0</li> <li>No experience 1</li> </ul> </li> </ul> | <ul style="list-style-type: none"> <li>Reasons baby taken out of (continuous) KMC: <ul style="list-style-type: none"> <li>✓ Feeding (breast/cup)</li> <li>Nappy change / clean baby</li> <li>✓ Mother meals</li> <li>✓ Mother toilet/bath</li> <li>Mother laundry</li> <li>✓ Mother must go out</li> <li>No guardian around</li> <li>✓ Mother tired</li> <li>✓ Mother in pain</li> <li>✓ Reluctance of mother</li> </ul> </li> <li>Decision readiness for KMC: <ul style="list-style-type: none"> <li>Doctor: 5</li> <li>Nurse(s): 2</li> <li>Joint doctor &amp; nurse(s): 7</li> </ul> </li> <li>Awareness of KMC being promoted in antenatal care services: 1/7</li> <li>Transport to facility in KMC position: <ul style="list-style-type: none"> <li>Always 0</li> <li>Sometimes 0</li> <li>Seldom, never 1</li> <li>No experience 6</li> </ul> </li> <li>Transport from facility in KMC position: <ul style="list-style-type: none"> <li>Always 2</li> <li>Sometimes 1</li> <li>Seldom, never 2</li> <li>No experience 2</li> </ul> </li> </ul> | <ul style="list-style-type: none"> <li>Reasons baby taken out of (continuous) KMC: <ul style="list-style-type: none"> <li>Feeding (breast/cup)</li> <li>Nappy change / clean baby</li> <li>✓ Mother meals</li> <li>✓ Mother toilet/bath</li> <li>✓ Mother laundry</li> <li>Mother must go out</li> <li>✓ No guardian around</li> <li>✓ Mother tired</li> <li>Mother in pain</li> <li>✓ Reluctance of mother</li> </ul> </li> <li>Decision readiness for KMC: <ul style="list-style-type: none"> <li>Doctor: 6</li> <li>Nurse(s): 1</li> <li>Joint doctor &amp; nurse(s): 2</li> </ul> </li> <li>Awareness of KMC being promoted in antenatal care services: 0/7</li> <li>Transport to facility in KMC position: <ul style="list-style-type: none"> <li>Always 1</li> <li>Sometimes 4</li> <li>Seldom, never 1</li> <li>No experience 1</li> </ul> </li> <li>Transport from facility in KMC position: <ul style="list-style-type: none"> <li>Always 2</li> <li>Sometimes 3</li> <li>Seldom, never 1</li> <li>No experience 1</li> </ul> </li> </ul> | <ul style="list-style-type: none"> <li>Reasons baby taken out of (continuous) KMC: <ul style="list-style-type: none"> <li>✓ Feeding (breast/cup)</li> <li>✓ Nappy change / clean baby</li> <li>✓ Mother meals</li> <li>✓ Mother toilet/bath</li> <li>✓ Mother laundry</li> <li>✓ Mother must go out</li> <li>No guardian around</li> <li>✓ Mother tired</li> <li>✓ Mother in pain</li> <li>Reluctance of mother</li> </ul> </li> <li>Decision readiness for KMC: <ul style="list-style-type: none"> <li>Doctor: 8</li> <li>Nurse(s): 3</li> <li>Joint doctor &amp; nurse(s): 7</li> </ul> </li> <li>Awareness of KMC being promoted in antenatal care services: 3/11</li> <li>Transport to facility in KMC position: <ul style="list-style-type: none"> <li>Always 0</li> <li>Sometimes 2</li> <li>Seldom, never 9</li> <li>No experience 0</li> </ul> </li> <li>Transport from facility in KMC position: <ul style="list-style-type: none"> <li>Always 3</li> <li>Sometimes 3</li> <li>Seldom, never 5</li> <li>No experience 0</li> </ul> </li> </ul> |

| Topic              | Malawi                                                                                                                                                                                                                                                                                                                                                                                                                                                                                                                                                                                                                                                                                                                                                                                                                                                                                                         | Mali      | Rwanda | Uganda    |      |             |      |                    |      |                                                                                                                                                                                                                                                                                                                                                                                                                                                                                                                                                                                                                                                                                                                                                                                                                                                                                                   |           |     |           |     |             |     |                    |     |                                                                                                                                                                                                                                                                                                                                                                                                                                                                                                                                                                                                                                                                                                                                                                                                                                                                                                 |           |     |           |     |             |     |                    |     |                                                                                                                                                                                                                                                                                                                                                                                                                                                                                                                                                                                                                                                                                                                                                                                                                                                                                                        |           |      |           |      |             |      |                    |      |
|--------------------|----------------------------------------------------------------------------------------------------------------------------------------------------------------------------------------------------------------------------------------------------------------------------------------------------------------------------------------------------------------------------------------------------------------------------------------------------------------------------------------------------------------------------------------------------------------------------------------------------------------------------------------------------------------------------------------------------------------------------------------------------------------------------------------------------------------------------------------------------------------------------------------------------------------|-----------|--------|-----------|------|-------------|------|--------------------|------|---------------------------------------------------------------------------------------------------------------------------------------------------------------------------------------------------------------------------------------------------------------------------------------------------------------------------------------------------------------------------------------------------------------------------------------------------------------------------------------------------------------------------------------------------------------------------------------------------------------------------------------------------------------------------------------------------------------------------------------------------------------------------------------------------------------------------------------------------------------------------------------------------|-----------|-----|-----------|-----|-------------|-----|--------------------|-----|-------------------------------------------------------------------------------------------------------------------------------------------------------------------------------------------------------------------------------------------------------------------------------------------------------------------------------------------------------------------------------------------------------------------------------------------------------------------------------------------------------------------------------------------------------------------------------------------------------------------------------------------------------------------------------------------------------------------------------------------------------------------------------------------------------------------------------------------------------------------------------------------------|-----------|-----|-----------|-----|-------------|-----|--------------------|-----|--------------------------------------------------------------------------------------------------------------------------------------------------------------------------------------------------------------------------------------------------------------------------------------------------------------------------------------------------------------------------------------------------------------------------------------------------------------------------------------------------------------------------------------------------------------------------------------------------------------------------------------------------------------------------------------------------------------------------------------------------------------------------------------------------------------------------------------------------------------------------------------------------------|-----------|------|-----------|------|-------------|------|--------------------|------|
| Position           | <ul style="list-style-type: none"> <li>Babies observed in KMC position: 8/14</li> <li>Recording of intermittent KMC: 0/9</li> <li>Schedule / Programme for intermittent KMC: 0/9</li> <li>Mothers' diligence of KMC practice               <table> <tr> <td>Diligent:</td> <td>7/14</td> </tr> <tr> <td>Some KMC:</td> <td>3/14</td> </tr> <tr> <td>Little KMC:</td> <td>2/14</td> </tr> <tr> <td>Not able to judge:</td> <td>2/14</td> </tr> </table> </li> <li>Tying methods:               <ul style="list-style-type: none"> <li>✓ Local cloth</li> <li>Lycra band</li> <li>✓ Special blouse</li> <li>Square with bands</li> <li>Kalafong thari</li> <li>Sheets</li> </ul> </li> <li>Movement of mother with baby in KMC:               <ul style="list-style-type: none"> <li>✓ Only in KMC room (2)</li> <li>✓ In neonatal unit/maternity</li> <li>✓ Within hospital premises (2)</li> </ul> </li> </ul> | Diligent: | 7/14   | Some KMC: | 3/14 | Little KMC: | 2/14 | Not able to judge: | 2/14 | <ul style="list-style-type: none"> <li>Babies observed in KMC position: 2/7</li> <li>Recording of intermittent KMC: 0/2</li> <li>Schedule / Programme for intermittent KMC: 0/2</li> <li>Mothers' diligence of KMC practice               <table> <tr> <td>Diligent:</td> <td>1/7</td> </tr> <tr> <td>Some KMC:</td> <td>0/7</td> </tr> <tr> <td>Little KMC:</td> <td>0/7</td> </tr> <tr> <td>Not able to judge:</td> <td>6/7</td> </tr> </table> </li> <li>Tying methods:               <ul style="list-style-type: none"> <li>✓ Local cloth</li> <li>✓ Lycra band</li> <li>Special blouse</li> <li>✓ Square with bands</li> <li>Kalafong thari</li> <li>Sheets</li> </ul> </li> <li>Movement of mother with baby in KMC:               <ul style="list-style-type: none"> <li>Only in KMC room</li> <li>✓ In paediatric services</li> <li>✓ Within hospital premises (2)</li> </ul> </li> </ul> | Diligent: | 1/7 | Some KMC: | 0/7 | Little KMC: | 0/7 | Not able to judge: | 6/7 | <ul style="list-style-type: none"> <li>Babies observed in KMC position: 7/7</li> <li>Recording of intermittent KMC: 0/3</li> <li>Schedule / Programme for intermittent KMC: 0/3</li> <li>Mothers' diligence of KMC practice               <table> <tr> <td>Diligent:</td> <td>6/7</td> </tr> <tr> <td>Some KMC:</td> <td>0/7</td> </tr> <tr> <td>Little KMC:</td> <td>1/7</td> </tr> <tr> <td>Not able to judge:</td> <td>0/7</td> </tr> </table> </li> <li>Tying methods:               <ul style="list-style-type: none"> <li>✓ Local cloth</li> <li>Lycra band</li> <li>Special blouse</li> <li>Square with bands</li> <li>✓ Kalafong thari</li> <li>Sheets</li> </ul> </li> <li>Movement of mother with baby in KMC:               <ul style="list-style-type: none"> <li>Only in KMC room</li> <li>✓ In neonatal unit/maternity</li> <li>✓ Within hospital premises</li> </ul> </li> </ul> | Diligent: | 6/7 | Some KMC: | 0/7 | Little KMC: | 1/7 | Not able to judge: | 0/7 | <ul style="list-style-type: none"> <li>Babies observed in KMC position: 6/11</li> <li>Recording of intermittent KMC: 2/6</li> <li>Schedule / Programme for intermittent KMC: 0/6</li> <li>Mothers' diligence of KMC practice               <table> <tr> <td>Diligent:</td> <td>3/11</td> </tr> <tr> <td>Some KMC:</td> <td>4/11</td> </tr> <tr> <td>Little KMC:</td> <td>1/11</td> </tr> <tr> <td>Not able to judge:</td> <td>3/11</td> </tr> </table> </li> <li>Tying methods:               <ul style="list-style-type: none"> <li>✓ Local cloth</li> <li>Lycra band</li> <li>Special blouse</li> <li>Square with bands</li> <li>✓ Kalafong thari</li> <li>✓ Sheets</li> </ul> </li> <li>Movement of mother with baby in KMC:               <ul style="list-style-type: none"> <li>✓ Only in KMC room</li> <li>✓ In neonatal unit/maternity</li> <li>Within hospital premises</li> </ul> </li> </ul> | Diligent: | 3/11 | Some KMC: | 4/11 | Little KMC: | 1/11 | Not able to judge: | 3/11 |
| Diligent:          | 7/14                                                                                                                                                                                                                                                                                                                                                                                                                                                                                                                                                                                                                                                                                                                                                                                                                                                                                                           |           |        |           |      |             |      |                    |      |                                                                                                                                                                                                                                                                                                                                                                                                                                                                                                                                                                                                                                                                                                                                                                                                                                                                                                   |           |     |           |     |             |     |                    |     |                                                                                                                                                                                                                                                                                                                                                                                                                                                                                                                                                                                                                                                                                                                                                                                                                                                                                                 |           |     |           |     |             |     |                    |     |                                                                                                                                                                                                                                                                                                                                                                                                                                                                                                                                                                                                                                                                                                                                                                                                                                                                                                        |           |      |           |      |             |      |                    |      |
| Some KMC:          | 3/14                                                                                                                                                                                                                                                                                                                                                                                                                                                                                                                                                                                                                                                                                                                                                                                                                                                                                                           |           |        |           |      |             |      |                    |      |                                                                                                                                                                                                                                                                                                                                                                                                                                                                                                                                                                                                                                                                                                                                                                                                                                                                                                   |           |     |           |     |             |     |                    |     |                                                                                                                                                                                                                                                                                                                                                                                                                                                                                                                                                                                                                                                                                                                                                                                                                                                                                                 |           |     |           |     |             |     |                    |     |                                                                                                                                                                                                                                                                                                                                                                                                                                                                                                                                                                                                                                                                                                                                                                                                                                                                                                        |           |      |           |      |             |      |                    |      |
| Little KMC:        | 2/14                                                                                                                                                                                                                                                                                                                                                                                                                                                                                                                                                                                                                                                                                                                                                                                                                                                                                                           |           |        |           |      |             |      |                    |      |                                                                                                                                                                                                                                                                                                                                                                                                                                                                                                                                                                                                                                                                                                                                                                                                                                                                                                   |           |     |           |     |             |     |                    |     |                                                                                                                                                                                                                                                                                                                                                                                                                                                                                                                                                                                                                                                                                                                                                                                                                                                                                                 |           |     |           |     |             |     |                    |     |                                                                                                                                                                                                                                                                                                                                                                                                                                                                                                                                                                                                                                                                                                                                                                                                                                                                                                        |           |      |           |      |             |      |                    |      |
| Not able to judge: | 2/14                                                                                                                                                                                                                                                                                                                                                                                                                                                                                                                                                                                                                                                                                                                                                                                                                                                                                                           |           |        |           |      |             |      |                    |      |                                                                                                                                                                                                                                                                                                                                                                                                                                                                                                                                                                                                                                                                                                                                                                                                                                                                                                   |           |     |           |     |             |     |                    |     |                                                                                                                                                                                                                                                                                                                                                                                                                                                                                                                                                                                                                                                                                                                                                                                                                                                                                                 |           |     |           |     |             |     |                    |     |                                                                                                                                                                                                                                                                                                                                                                                                                                                                                                                                                                                                                                                                                                                                                                                                                                                                                                        |           |      |           |      |             |      |                    |      |
| Diligent:          | 1/7                                                                                                                                                                                                                                                                                                                                                                                                                                                                                                                                                                                                                                                                                                                                                                                                                                                                                                            |           |        |           |      |             |      |                    |      |                                                                                                                                                                                                                                                                                                                                                                                                                                                                                                                                                                                                                                                                                                                                                                                                                                                                                                   |           |     |           |     |             |     |                    |     |                                                                                                                                                                                                                                                                                                                                                                                                                                                                                                                                                                                                                                                                                                                                                                                                                                                                                                 |           |     |           |     |             |     |                    |     |                                                                                                                                                                                                                                                                                                                                                                                                                                                                                                                                                                                                                                                                                                                                                                                                                                                                                                        |           |      |           |      |             |      |                    |      |
| Some KMC:          | 0/7                                                                                                                                                                                                                                                                                                                                                                                                                                                                                                                                                                                                                                                                                                                                                                                                                                                                                                            |           |        |           |      |             |      |                    |      |                                                                                                                                                                                                                                                                                                                                                                                                                                                                                                                                                                                                                                                                                                                                                                                                                                                                                                   |           |     |           |     |             |     |                    |     |                                                                                                                                                                                                                                                                                                                                                                                                                                                                                                                                                                                                                                                                                                                                                                                                                                                                                                 |           |     |           |     |             |     |                    |     |                                                                                                                                                                                                                                                                                                                                                                                                                                                                                                                                                                                                                                                                                                                                                                                                                                                                                                        |           |      |           |      |             |      |                    |      |
| Little KMC:        | 0/7                                                                                                                                                                                                                                                                                                                                                                                                                                                                                                                                                                                                                                                                                                                                                                                                                                                                                                            |           |        |           |      |             |      |                    |      |                                                                                                                                                                                                                                                                                                                                                                                                                                                                                                                                                                                                                                                                                                                                                                                                                                                                                                   |           |     |           |     |             |     |                    |     |                                                                                                                                                                                                                                                                                                                                                                                                                                                                                                                                                                                                                                                                                                                                                                                                                                                                                                 |           |     |           |     |             |     |                    |     |                                                                                                                                                                                                                                                                                                                                                                                                                                                                                                                                                                                                                                                                                                                                                                                                                                                                                                        |           |      |           |      |             |      |                    |      |
| Not able to judge: | 6/7                                                                                                                                                                                                                                                                                                                                                                                                                                                                                                                                                                                                                                                                                                                                                                                                                                                                                                            |           |        |           |      |             |      |                    |      |                                                                                                                                                                                                                                                                                                                                                                                                                                                                                                                                                                                                                                                                                                                                                                                                                                                                                                   |           |     |           |     |             |     |                    |     |                                                                                                                                                                                                                                                                                                                                                                                                                                                                                                                                                                                                                                                                                                                                                                                                                                                                                                 |           |     |           |     |             |     |                    |     |                                                                                                                                                                                                                                                                                                                                                                                                                                                                                                                                                                                                                                                                                                                                                                                                                                                                                                        |           |      |           |      |             |      |                    |      |
| Diligent:          | 6/7                                                                                                                                                                                                                                                                                                                                                                                                                                                                                                                                                                                                                                                                                                                                                                                                                                                                                                            |           |        |           |      |             |      |                    |      |                                                                                                                                                                                                                                                                                                                                                                                                                                                                                                                                                                                                                                                                                                                                                                                                                                                                                                   |           |     |           |     |             |     |                    |     |                                                                                                                                                                                                                                                                                                                                                                                                                                                                                                                                                                                                                                                                                                                                                                                                                                                                                                 |           |     |           |     |             |     |                    |     |                                                                                                                                                                                                                                                                                                                                                                                                                                                                                                                                                                                                                                                                                                                                                                                                                                                                                                        |           |      |           |      |             |      |                    |      |
| Some KMC:          | 0/7                                                                                                                                                                                                                                                                                                                                                                                                                                                                                                                                                                                                                                                                                                                                                                                                                                                                                                            |           |        |           |      |             |      |                    |      |                                                                                                                                                                                                                                                                                                                                                                                                                                                                                                                                                                                                                                                                                                                                                                                                                                                                                                   |           |     |           |     |             |     |                    |     |                                                                                                                                                                                                                                                                                                                                                                                                                                                                                                                                                                                                                                                                                                                                                                                                                                                                                                 |           |     |           |     |             |     |                    |     |                                                                                                                                                                                                                                                                                                                                                                                                                                                                                                                                                                                                                                                                                                                                                                                                                                                                                                        |           |      |           |      |             |      |                    |      |
| Little KMC:        | 1/7                                                                                                                                                                                                                                                                                                                                                                                                                                                                                                                                                                                                                                                                                                                                                                                                                                                                                                            |           |        |           |      |             |      |                    |      |                                                                                                                                                                                                                                                                                                                                                                                                                                                                                                                                                                                                                                                                                                                                                                                                                                                                                                   |           |     |           |     |             |     |                    |     |                                                                                                                                                                                                                                                                                                                                                                                                                                                                                                                                                                                                                                                                                                                                                                                                                                                                                                 |           |     |           |     |             |     |                    |     |                                                                                                                                                                                                                                                                                                                                                                                                                                                                                                                                                                                                                                                                                                                                                                                                                                                                                                        |           |      |           |      |             |      |                    |      |
| Not able to judge: | 0/7                                                                                                                                                                                                                                                                                                                                                                                                                                                                                                                                                                                                                                                                                                                                                                                                                                                                                                            |           |        |           |      |             |      |                    |      |                                                                                                                                                                                                                                                                                                                                                                                                                                                                                                                                                                                                                                                                                                                                                                                                                                                                                                   |           |     |           |     |             |     |                    |     |                                                                                                                                                                                                                                                                                                                                                                                                                                                                                                                                                                                                                                                                                                                                                                                                                                                                                                 |           |     |           |     |             |     |                    |     |                                                                                                                                                                                                                                                                                                                                                                                                                                                                                                                                                                                                                                                                                                                                                                                                                                                                                                        |           |      |           |      |             |      |                    |      |
| Diligent:          | 3/11                                                                                                                                                                                                                                                                                                                                                                                                                                                                                                                                                                                                                                                                                                                                                                                                                                                                                                           |           |        |           |      |             |      |                    |      |                                                                                                                                                                                                                                                                                                                                                                                                                                                                                                                                                                                                                                                                                                                                                                                                                                                                                                   |           |     |           |     |             |     |                    |     |                                                                                                                                                                                                                                                                                                                                                                                                                                                                                                                                                                                                                                                                                                                                                                                                                                                                                                 |           |     |           |     |             |     |                    |     |                                                                                                                                                                                                                                                                                                                                                                                                                                                                                                                                                                                                                                                                                                                                                                                                                                                                                                        |           |      |           |      |             |      |                    |      |
| Some KMC:          | 4/11                                                                                                                                                                                                                                                                                                                                                                                                                                                                                                                                                                                                                                                                                                                                                                                                                                                                                                           |           |        |           |      |             |      |                    |      |                                                                                                                                                                                                                                                                                                                                                                                                                                                                                                                                                                                                                                                                                                                                                                                                                                                                                                   |           |     |           |     |             |     |                    |     |                                                                                                                                                                                                                                                                                                                                                                                                                                                                                                                                                                                                                                                                                                                                                                                                                                                                                                 |           |     |           |     |             |     |                    |     |                                                                                                                                                                                                                                                                                                                                                                                                                                                                                                                                                                                                                                                                                                                                                                                                                                                                                                        |           |      |           |      |             |      |                    |      |
| Little KMC:        | 1/11                                                                                                                                                                                                                                                                                                                                                                                                                                                                                                                                                                                                                                                                                                                                                                                                                                                                                                           |           |        |           |      |             |      |                    |      |                                                                                                                                                                                                                                                                                                                                                                                                                                                                                                                                                                                                                                                                                                                                                                                                                                                                                                   |           |     |           |     |             |     |                    |     |                                                                                                                                                                                                                                                                                                                                                                                                                                                                                                                                                                                                                                                                                                                                                                                                                                                                                                 |           |     |           |     |             |     |                    |     |                                                                                                                                                                                                                                                                                                                                                                                                                                                                                                                                                                                                                                                                                                                                                                                                                                                                                                        |           |      |           |      |             |      |                    |      |
| Not able to judge: | 3/11                                                                                                                                                                                                                                                                                                                                                                                                                                                                                                                                                                                                                                                                                                                                                                                                                                                                                                           |           |        |           |      |             |      |                    |      |                                                                                                                                                                                                                                                                                                                                                                                                                                                                                                                                                                                                                                                                                                                                                                                                                                                                                                   |           |     |           |     |             |     |                    |     |                                                                                                                                                                                                                                                                                                                                                                                                                                                                                                                                                                                                                                                                                                                                                                                                                                                                                                 |           |     |           |     |             |     |                    |     |                                                                                                                                                                                                                                                                                                                                                                                                                                                                                                                                                                                                                                                                                                                                                                                                                                                                                                        |           |      |           |      |             |      |                    |      |

| Topic                                     | Malawi                                                                                                                                                                                                                                                                                                                                                                                                                                                                                                                                                                                                                           | Mali                                                                                                                                                                                                                                                                                                                                                                                                                                                                                                                                                                                                                      | Rwanda                                                                                                                                                                                                                                                                                                                                                                                                                                                                                                                                                                                                                                        | Uganda                                                                                                                                                                                                                                                                                                                                                                                                                                                                                                                                                                                                                        |
|-------------------------------------------|----------------------------------------------------------------------------------------------------------------------------------------------------------------------------------------------------------------------------------------------------------------------------------------------------------------------------------------------------------------------------------------------------------------------------------------------------------------------------------------------------------------------------------------------------------------------------------------------------------------------------------|---------------------------------------------------------------------------------------------------------------------------------------------------------------------------------------------------------------------------------------------------------------------------------------------------------------------------------------------------------------------------------------------------------------------------------------------------------------------------------------------------------------------------------------------------------------------------------------------------------------------------|-----------------------------------------------------------------------------------------------------------------------------------------------------------------------------------------------------------------------------------------------------------------------------------------------------------------------------------------------------------------------------------------------------------------------------------------------------------------------------------------------------------------------------------------------------------------------------------------------------------------------------------------------|-------------------------------------------------------------------------------------------------------------------------------------------------------------------------------------------------------------------------------------------------------------------------------------------------------------------------------------------------------------------------------------------------------------------------------------------------------------------------------------------------------------------------------------------------------------------------------------------------------------------------------|
|                                           | <ul style="list-style-type: none"> <li>• Role of guardian / companion for mother:<br/>Guardian allowed: 8/14<br/>Unrestricted access: 3/8</li> <li>Tasks: <ul style="list-style-type: none"> <li>✓ Psychological support</li> <li>Helping mother with position</li> <li>✓ Carrying baby in KMC</li> <li>✓ Twins</li> <li>✓ Caesarean section</li> <li>✓ Illness</li> <li>✓ Spoon of cup feeding</li> <li>✓ Changing nappies</li> <li>✓ Collecting medication</li> <li>✓ Meals / Bringing food</li> <li>Washing mother's clothes</li> <li>✓ Motivator of KMC to mother</li> <li>✓ Father as support person</li> </ul> </li> </ul> | <ul style="list-style-type: none"> <li>• Role of guardian / companion for mother:<br/>Guardian allowed: 7/7<br/>Unrestricted access: 3/8</li> <li>Tasks: <ul style="list-style-type: none"> <li>✓ Psychological support</li> <li>✓ Helping mother with position</li> <li>✓ Carrying baby in KMC</li> <li>Twins</li> <li>Caesarean section</li> <li>Illness</li> <li>✓ Spoon of cup feeding</li> <li>Changing nappies</li> <li>✓ Collecting medication</li> <li>✓ Meals / Bringing food</li> <li>✓ Washing mother's clothes</li> <li>✓ Motivator of KMC to mother</li> <li>Father as support person</li> </ul> </li> </ul> | <ul style="list-style-type: none"> <li>• Role of guardian / companion for mother:</li> <li>• Guardian allowed: 6/7<br/>Unrestricted access: 2/7</li> <li>Tasks: <ul style="list-style-type: none"> <li>Psychological support</li> <li>Helping mother with position</li> <li>✓ Carrying baby in KMC</li> <li>✓ Twins</li> <li>Caesarean section</li> <li>✓ Illness (skin infection)</li> <li>Spoon of cup feeding</li> <li>Changing nappies</li> <li>Collecting medication</li> <li>✓ Meals / Bringing food</li> <li>✓ Washing mother's clothes</li> <li>Motivator of KMC to mother</li> <li>✓ Father as support person</li> </ul> </li> </ul> | <ul style="list-style-type: none"> <li>• Role of guardian / companion for mother:</li> <li>• Guardian allowed: 8/11<br/>Unrestricted access: 3/8</li> <li>Tasks: <ul style="list-style-type: none"> <li>✓ Psychological support</li> <li>Helping mother with position</li> <li>Carrying baby in KMC</li> <li>✓ Twins</li> <li>✓ Caesarean section</li> <li>Illness</li> <li>Spoon of cup feeding</li> <li>Changing nappies</li> <li>Collecting medication</li> <li>✓ Meals / Bringing food</li> <li>✓ Washing mother's clothes</li> <li>Motivator of KMC to mother</li> <li>✓ Father as support person</li> </ul> </li> </ul> |
| Nutrition (feeding and weight monitoring) | <ul style="list-style-type: none"> <li>• Written feeding policy: 3/14</li> <li>• Copy of policy provided: 2/3</li> <li>• Feeding job aid for calculating volumes of feeds:<br/>11/11 hospitals</li> <li>• Records of each EBM feed: 3/14</li> </ul>                                                                                                                                                                                                                                                                                                                                                                              | <ul style="list-style-type: none"> <li>• Written feeding policy: 4/7</li> <li>• Copy of policy provided: 4/4</li> <li>• Feeding job aid for calculating volumes of feeds:<br/>5/7 hospitals</li> <li>• Records of each EBM feed: 3/7</li> </ul>                                                                                                                                                                                                                                                                                                                                                                           | <ul style="list-style-type: none"> <li>• Written feeding policy:<br/>Incorporated in national neonatal protocols</li> <li>• Copy of policy provided: Printed document</li> <li>• Feeding job aid for calculating volumes of feeds:<br/>Part of neonatal protocols (displayed in 3 hospitals)</li> <li>• Records of each EBM feed: 4/7</li> </ul>                                                                                                                                                                                                                                                                                              | <ul style="list-style-type: none"> <li>• Written feeding policy: 3/11</li> <li>• Copy of policy provided: 3/3</li> <li>• Feeding job aid for calculating volumes of feeds:<br/>6/9 hospitals</li> <li>• Records of each EBM feed: 3/9</li> </ul>                                                                                                                                                                                                                                                                                                                                                                              |

| Topic                                                         | Malawi                                                                                                                                                                                                                                                                                                                                                                                                                                                     | Mali                                                                                                                                                                                                                                                                                                                                                                                                               | Rwanda                                                                                                                                                                                                                                                                                                                                                                                                      | Uganda                                                                                                                                                                                                                                                                                                                                                                                                                                                               |
|---------------------------------------------------------------|------------------------------------------------------------------------------------------------------------------------------------------------------------------------------------------------------------------------------------------------------------------------------------------------------------------------------------------------------------------------------------------------------------------------------------------------------------|--------------------------------------------------------------------------------------------------------------------------------------------------------------------------------------------------------------------------------------------------------------------------------------------------------------------------------------------------------------------------------------------------------------------|-------------------------------------------------------------------------------------------------------------------------------------------------------------------------------------------------------------------------------------------------------------------------------------------------------------------------------------------------------------------------------------------------------------|----------------------------------------------------------------------------------------------------------------------------------------------------------------------------------------------------------------------------------------------------------------------------------------------------------------------------------------------------------------------------------------------------------------------------------------------------------------------|
|                                                               | <ul style="list-style-type: none"> <li>Regular weighing of babies: 11/14<br/>Once per day: 0<br/>Twice per week: 1</li> <li>Recording of weight: <ul style="list-style-type: none"> <li>✓ Baby's observation sheet</li> <li>✓ Baby's file (nursing/doctors notes)</li> <li>✓ Feeding chart</li> <li>✓ KMC register<br/>Daily weight register</li> <li>✓ Labour chart<br/>Baby's health passport</li> <li>✓ Mother's health passport</li> </ul> </li> </ul> | <ul style="list-style-type: none"> <li>Regular weighing of babies: 7/7<br/>Once per day: 7</li> <li>Recording of weight: <ul style="list-style-type: none"> <li>✓ Baby's observation sheet<br/>Baby's file (nursing/doctors notes)</li> <li>Feeding chart</li> <li>✓ KMC register<br/>Daily weight register<br/>Labour chart</li> <li>✓ Baby's health passport<br/>Mother's health passport</li> </ul> </li> </ul> | <ul style="list-style-type: none"> <li>Regular weighing of babies: 7/7<br/>Once per day: 7</li> <li>Recording of weight: <ul style="list-style-type: none"> <li>✓ Baby's observation sheet<br/>Baby's file (nursing/doctors notes)</li> <li>Feeding chart<br/>KMC register</li> <li>✓ Daily weight register<br/>Labour chart<br/>Baby's health passport<br/>Mother's health passport</li> </ul> </li> </ul> | <ul style="list-style-type: none"> <li>Regular weighing of babies: 7/11<br/>Once per day: 10<br/>Once every 2 days: 2<br/>Once per week: 1</li> <li>Recording of weight: <ul style="list-style-type: none"> <li>✓ Baby's observation sheet</li> <li>✓ Baby's file (nursing/doctors notes)</li> <li>Feeding chart<br/>KMC register<br/>Daily weight register</li> <li>✓ Mother's chart<br/>Baby's health passport<br/>Mother's health passport</li> </ul> </li> </ul> |
| Documentation and record keeping (availability, completeness) | <ul style="list-style-type: none"> <li>Quality of data:<br/>Good: 4<br/>Average: 6<br/>Poor: 4</li> <li>Special collective KMC register (printed or handwritten): 10/14</li> <li>Other records with KMC evidence: <ul style="list-style-type: none"> <li>✓ Baby's observation sheet (3)</li> <li>✓ Nurses' or doctors' notes (4)</li> <li>✓ Baby's health passport (10)<br/>Discharge letter</li> </ul> </li> </ul>                                        | <ul style="list-style-type: none"> <li>Quality of data:<br/>Good: 2<br/>Average: 4<br/>Poor: 1</li> <li>Special collective KMC register (printed or handwritten): 7/7</li> <li>Other records with KMC evidence: <ul style="list-style-type: none"> <li>✓ Baby's observation sheet (5)</li> <li>✓ Nurses' or doctors' notes</li> <li>✓ Baby's health passport (6)<br/>Discharge letter</li> </ul> </li> </ul>       | <ul style="list-style-type: none"> <li>Quality of data:<br/>Good: 2<br/>Average: 5<br/>Poor: 0</li> <li>Special collective KMC register (printed or handwritten): 5/7</li> <li>Other records with KMC evidence: <ul style="list-style-type: none"> <li>✓ Baby's observation sheet (6)</li> <li>✓ Nurses' or doctors' notes (4)<br/>Baby's health passport<br/>Discharge letter</li> </ul> </li> </ul>       | <ul style="list-style-type: none"> <li>Quality of data:<br/>Good: 1<br/>Average: 6<br/>Poor: 4</li> <li>Special collective KMC register (printed or handwritten): 7/11</li> <li>Other records with KMC evidence: <ul style="list-style-type: none"> <li>Baby's observation sheet</li> <li>✓ Nurses' or doctors' notes (4)</li> <li>✓ Baby's health passport (1)</li> <li>✓ Discharge letter (1)</li> </ul> </li> </ul>                                               |



| Topic | Malawi                                                                                                                                                                                                                                                                                                                                                                                                                                                                                                                                                                                                                | Mali                                                                                                                                                                                                                                                                                                                                                                                                                                                                                  | Rwanda                                                                                                                                                                                                                                                                                                                                                                                                                                                                                                                                                                                                                       | Uganda                                                                                                                                                                                                                                                                                                                                                                                                                                          |
|-------|-----------------------------------------------------------------------------------------------------------------------------------------------------------------------------------------------------------------------------------------------------------------------------------------------------------------------------------------------------------------------------------------------------------------------------------------------------------------------------------------------------------------------------------------------------------------------------------------------------------------------|---------------------------------------------------------------------------------------------------------------------------------------------------------------------------------------------------------------------------------------------------------------------------------------------------------------------------------------------------------------------------------------------------------------------------------------------------------------------------------------|------------------------------------------------------------------------------------------------------------------------------------------------------------------------------------------------------------------------------------------------------------------------------------------------------------------------------------------------------------------------------------------------------------------------------------------------------------------------------------------------------------------------------------------------------------------------------------------------------------------------------|-------------------------------------------------------------------------------------------------------------------------------------------------------------------------------------------------------------------------------------------------------------------------------------------------------------------------------------------------------------------------------------------------------------------------------------------------|
|       | <ul style="list-style-type: none"> <li>• Summary figures for at least one year: 13/14<br/>No breakdown continuous and intermittent KMC<br/>LBW babies with and without KMC grouped together<br/>Poor recording – accuracy of audit?</li> <li>• Written documents to contribute to sustainability: <ul style="list-style-type: none"> <li>Checklist procedures on admission (0)</li> <li>✓ Guidelines for practice of KMC / LBW (9)</li> <li>✓ Criteria for admission &amp; re-admission (4)</li> <li>✓ Discharge criteria (2)</li> <li>✓ Daily monitoring (1)</li> <li>✓ Daily counselling (1)</li> </ul> </li> </ul> | <ul style="list-style-type: none"> <li>• Summary figures for at least one year: 3/7<br/>Poor recording – accuracy of audit?</li> <li>• Written documents to contribute to sustainability: <ul style="list-style-type: none"> <li>Checklist procedures on admission (0)</li> <li>✓ Guidelines for practice of KMC / LBW (2)</li> <li>Criteria for admission &amp; re-admission</li> <li>Discharge criteria</li> <li>Daily monitoring</li> <li>Daily counselling</li> </ul> </li> </ul> | <ul style="list-style-type: none"> <li>• Summary figures for at least one year: 4/7<br/>No breakdown continuous and intermittent KMC<br/>LBW babies with and without KMC grouped together</li> <li>• Written documents to contribute to sustainability: <ul style="list-style-type: none"> <li>Checklist procedures on admission (0)</li> <li>✓ Guidelines for practice of KMC / LBW (7)*</li> <li>✓ Criteria for admission &amp; re-admission (7)*</li> <li>✓ Discharge criteria (7)*</li> <li>✓ Daily monitoring (7)*</li> <li>✓ Daily counselling</li> </ul> </li> </ul> <p>* Included in national neonatal protocols</p> | <ul style="list-style-type: none"> <li>• Summary figures for at least one year: 4/7</li> <li>• Written documents to contribute to sustainability: <ul style="list-style-type: none"> <li>✓ Checklist procedures on admission (2)</li> <li>✓ Guidelines for practice of KMC / LBW (2)</li> <li>Criteria for admission &amp; re-admission</li> <li>Discharge criteria</li> <li>Daily monitoring</li> <li>Daily counselling</li> </ul> </li> </ul> |
| Staff | <ul style="list-style-type: none"> <li>• Total of known number of health workers trained in KMC: 780<br/>A lot of training integrated in ENC, IMNC and EMOnC</li> <li>• Total of known number trained in facilities visited: 238<br/>Range per facility: 0-155</li> </ul>                                                                                                                                                                                                                                                                                                                                             | <ul style="list-style-type: none"> <li>• Total of known number of health workers trained in KMC: Unknown</li> <li>• Total of known number trained in facilities visited: 142<br/>Range per facility: 2-71<br/>Problem of staff leaving shortly after having been trained – loss of continuity and skills</li> </ul>                                                                                                                                                                   | <ul style="list-style-type: none"> <li>• Total of known number of health workers trained in KMC: 501<br/>A lot of training integrated in ENC, IMNC and EMOnC</li> <li>• Total of known number trained in facilities visited: 60<br/>Range per facility: 3-14</li> </ul>                                                                                                                                                                                                                                                                                                                                                      | <ul style="list-style-type: none"> <li>• Total of known number of health workers trained in KMC: Unknown<br/>A lot of training integrated in ENC, IMNC and EMOnC</li> <li>• Total of known number trained in facilities visited: 262 (under-estimate)<br/>Range per facility: 1-60</li> </ul>                                                                                                                                                   |

| Topic                   | Malawi                                                                                                                                                                                                                                                                                                                                                                                                                                                                                                                                    | Mali                                                                                                                                                                                                                                                                                                                                 | Rwanda                                                                                                                                                                                                                                                                                                                               | Uganda                                                                                                                                                                                                                                                                                                                                                                                                       |
|-------------------------|-------------------------------------------------------------------------------------------------------------------------------------------------------------------------------------------------------------------------------------------------------------------------------------------------------------------------------------------------------------------------------------------------------------------------------------------------------------------------------------------------------------------------------------------|--------------------------------------------------------------------------------------------------------------------------------------------------------------------------------------------------------------------------------------------------------------------------------------------------------------------------------------|--------------------------------------------------------------------------------------------------------------------------------------------------------------------------------------------------------------------------------------------------------------------------------------------------------------------------------------|--------------------------------------------------------------------------------------------------------------------------------------------------------------------------------------------------------------------------------------------------------------------------------------------------------------------------------------------------------------------------------------------------------------|
|                         | <ul style="list-style-type: none"> <li>• Long-term plan for KMC training: 8/14</li> <li>• Plan in writing: 3/8</li> <li>• Staff allocations:<br/>Rotation of nurses: 10/14<br/>No night duty for registered nurses: 2/10<br/>KMC wards not adequately supervised, especially at night</li> <li>• Special KMC orientation programme for new staff: 3/14</li> <li>• Practical training for students: 12/14<br/>Nursing: 11/12<br/>Medical &amp; related: 8/12</li> <li>• Not all (especially junior) students rotate through KMC</li> </ul> | <ul style="list-style-type: none"> <li>• Long-term plan for KMC training: 2/7</li> <li>• Plan in writing: 1/2</li> <li>• Staff allocations:<br/>Rotation of nurses: 0/7</li> <li>• Special KMC orientation programme for new staff: 2/7</li> <li>• Practical training for students: 7/7<br/>Nursing: 7/7<br/>Medical: 6/7</li> </ul> | <ul style="list-style-type: none"> <li>• Long-term plan for KMC training: 6/7</li> <li>• Plan in writing: 0/6</li> <li>• Staff allocations:<br/>Rotation of nurses: 1/7</li> <li>• Special KMC orientation programme for new staff: 6/7</li> <li>• Practical training for students: 5/7<br/>Nursing: 5/5<br/>Medical: 5/5</li> </ul> | <ul style="list-style-type: none"> <li>• Long-term plan for KMC training: 3/11</li> <li>• Plan in writing: 1/3</li> <li>• Staff allocations:<br/>Rotation of nurses: 11/11</li> <li>• Special KMC orientation programme for new staff: 5/11</li> <li>• Practical training for students: 9/11<br/>Nursing: 8/9<br/>Medical: 5/9</li> <li>• Not all (especially junior) students rotate through KMC</li> </ul> |
| Discharge and follow-up | <ul style="list-style-type: none"> <li>• Decision readiness for discharge:<br/>Clinical Officer: 0<br/>Nurse(s): 14<br/>Joint CO &amp; nurse(s): 5<br/>Mother's request: 0</li> <li>• Evidence of follow-up system (documentation, schedule, etc):<br/>Good evidence: 3<br/>Partial evidence: 9<br/>Little / No evidence: 2</li> </ul>                                                                                                                                                                                                    | <ul style="list-style-type: none"> <li>• Decision readiness for discharge:<br/>Doctor: 6<br/>Nurse(s): 1<br/>Joint doctor &amp; nurse(s): 3<br/>Mother's request: 0</li> <li>• Evidence of follow-up system (documentation, schedule, etc):<br/>Good evidence: 4<br/>Partial evidence: 3<br/>Little / No evidence: 0</li> </ul>      | <ul style="list-style-type: none"> <li>• Decision readiness for discharge:<br/>Doctor: 7<br/>Nurse(s): 0<br/>Joint doctor &amp; nurse(s): 1<br/>Mother's request: 0</li> <li>• Evidence of follow-up system (documentation, schedule, etc):<br/>Good evidence: 5<br/>Partial evidence: 2<br/>Little / No evidence: 0</li> </ul>      | <ul style="list-style-type: none"> <li>• Decision readiness for discharge:<br/>Doctor: 8<br/>Nurse(s): 3<br/>Joint doctor &amp; nurse(s): 7<br/>Mother's request: 5</li> <li>• Evidence of follow-up system (documentation, schedule, etc):<br/>Good evidence: 4<br/>Partial evidence: 2<br/>Little / No evidence: 5</li> </ul>                                                                              |

| Topic | Malawi                                                                                                                                                                                                                                                                                                                                                                                                                                                                                                                                                                                                                                                                             | Mali                                                                                                                                                                                                                                                                                                                                                                                                                                                                                                                                                                                                                                                                            | Rwanda                                                                                                                                                                                                                                                                                                                                                                                                                                                                                                                                                                                                                                                                     | Uganda                                                                                                                                                                                                                                                                                                                                                                                                                                                                                                                                                                                                                                                                                                                                              |
|-------|------------------------------------------------------------------------------------------------------------------------------------------------------------------------------------------------------------------------------------------------------------------------------------------------------------------------------------------------------------------------------------------------------------------------------------------------------------------------------------------------------------------------------------------------------------------------------------------------------------------------------------------------------------------------------------|---------------------------------------------------------------------------------------------------------------------------------------------------------------------------------------------------------------------------------------------------------------------------------------------------------------------------------------------------------------------------------------------------------------------------------------------------------------------------------------------------------------------------------------------------------------------------------------------------------------------------------------------------------------------------------|----------------------------------------------------------------------------------------------------------------------------------------------------------------------------------------------------------------------------------------------------------------------------------------------------------------------------------------------------------------------------------------------------------------------------------------------------------------------------------------------------------------------------------------------------------------------------------------------------------------------------------------------------------------------------|-----------------------------------------------------------------------------------------------------------------------------------------------------------------------------------------------------------------------------------------------------------------------------------------------------------------------------------------------------------------------------------------------------------------------------------------------------------------------------------------------------------------------------------------------------------------------------------------------------------------------------------------------------------------------------------------------------------------------------------------------------|
|       | <ul style="list-style-type: none"> <li>• Location of initial follow-up:<br/>Mostly at facility where born or receiving KMC*<br/>In KMC space (7)<br/>In neonatal unit (1)<br/>Paediatric outpatients Maternity ward (4)<br/>* Excluding 2 community health centres</li> <li>• Records of follow-up visits:<br/>12/14<br/>✓ Register (date &amp; weight only) (10)<br/>✓ Baby's health passport (1)<br/>✓ Special follow-up form (1)<br/>Baby's original file<br/>Doctor's notes</li> <li>• End-point of special review:<br/>Weight: mostly 2500 g<br/><br/>Age: -<br/><br/>Number of visits: -</li> <li>• Estimates of follow-up rates:<br/>range of 50-100% (one = 5%)</li> </ul> | <ul style="list-style-type: none"> <li>• Location of initial follow-up:<br/>Mostly at facility where born or receiving KMC<br/>✓ In KMC space (4)<br/>✓ In neonatal unit (2)<br/>✓ Paediatric outpatients (1)<br/>Maternity ward</li> <li>• Records of follow-up visits:<br/>6/7<br/>Register (date &amp; weight only)<br/><br/>Baby's health passport<br/>✓ Special follow-up form (6)<br/>Baby's original file<br/>Doctor's notes</li> <li>• End-point of special review:<br/>Weight: 2500 g (2)<br/><br/>Age:<br/>1 year corrected age (3)<br/>18 months (1)<br/>2 years (1)<br/>Number of visits: -</li> <li>• Estimates of follow-up rates:<br/>range of 20-98%</li> </ul> | <ul style="list-style-type: none"> <li>• Location of initial follow-up:<br/>Mostly at facility where born or receiving KMC<br/>✓ In KMC space (2)<br/>✓ In neonatal unit (3)<br/>✓ Paediatric outpatients (2)<br/>Maternity ward</li> <li>• Records of follow-up visits:<br/>5/7<br/>✓ Register (date &amp; weight only) (3)<br/>Baby's health passport<br/>Special follow-up form (1)<br/>✓ Baby's original file (1)<br/>Doctor's notes</li> <li>• End-point of special review:<br/>Weight: 2000 g – 2500 g (4)<br/><br/>Age: -<br/><br/>Number of visits:<br/>1 visits (1)<br/>4 visits (2)</li> <li>• Estimates of follow-up rates:<br/>range of &lt;50-100%</li> </ul> | <ul style="list-style-type: none"> <li>• Location of initial follow-up:<br/>Mostly at facility where born or receiving KMC<br/>In KMC space<br/>✓ In neonatal unit (4)<br/>✓ Paediatric outpatients (3)<br/>✓ Maternity ward (4)</li> <li>• Records of follow-up visits:<br/>6/11<br/>✓ Register (date &amp; weight only) (3)<br/>Baby's health passport<br/>Special follow-up form<br/>✓ Baby's original file (1)<br/>✓ Doctor's notes (2)<br/>Mostly no distinction between LBW and KMC babies in records</li> <li>• End-point of special review:<br/>Weight: 2000 – 3000 g<br/>(Mostly 2500 g)<br/><br/>Age:<br/>2 years (1)<br/><br/>Number of visits:<br/>3 visits (1)</li> <li>• Estimates of follow-up rates:<br/>range of 30-95%</li> </ul> |

| Topic | Malawi                                                                                                                                                                                                                                        | Mali                                                                                                                                                                                                                                                               | Rwanda                                                                                                                                                                                                                                       | Uganda                                                                                                                                                                                                                                                                   |
|-------|-----------------------------------------------------------------------------------------------------------------------------------------------------------------------------------------------------------------------------------------------|--------------------------------------------------------------------------------------------------------------------------------------------------------------------------------------------------------------------------------------------------------------------|----------------------------------------------------------------------------------------------------------------------------------------------------------------------------------------------------------------------------------------------|--------------------------------------------------------------------------------------------------------------------------------------------------------------------------------------------------------------------------------------------------------------------------|
|       | <ul style="list-style-type: none"> <li>• Home visits:<br/>5 hospitals<br/>HSAs linked to health centres<br/>Mostly for tracing defaulters</li> </ul>                                                                                          | <ul style="list-style-type: none"> <li>• Home visits:<br/>None</li> </ul>                                                                                                                                                                                          | <ul style="list-style-type: none"> <li>• Home visits:<br/>None</li> </ul>                                                                                                                                                                    | <ul style="list-style-type: none"> <li>• Home visits:<br/>1 hospital (research study)<br/>3 informal visits<br/>Mostly for tracing defaulters</li> </ul>                                                                                                                 |
|       | <ul style="list-style-type: none"> <li>• Methods of communication with health centres:<br/>None<br/>Phone<br/>✓ Referral/discharge slip (6)<br/>✓ Baby's health passport (5)<br/>✓ Mother provided with contact number of HSAs (1)</li> </ul> | <ul style="list-style-type: none"> <li>• Methods of communication with health centres:<br/>✓ None (3)<br/>Phone<br/>✓ Referral/discharge slip (4)<br/>Baby's health passport<br/>Mother provided with contact number of nearest community health worker</li> </ul> | <ul style="list-style-type: none"> <li>• Methods of communication with health centres:<br/>✓ None (4)<br/>✓ Phone (1)<br/>✓ Referral/discharge slip (2)<br/>Baby's health passport<br/>Mother provided with contact number of ASM</li> </ul> | <ul style="list-style-type: none"> <li>• Methods of communication with health centres:<br/>✓ None (5)<br/>✓ Phone (2)<br/>✓ Referral/discharge slip (4)<br/>Baby's health passport<br/>Mother provided with contact number of nearest community health worker</li> </ul> |

| Topic                                         | Malawi                                                                                                                                                                                                                                                                                                                                                                                                                                                                                                                                                                   | Mali                                                                                                                                                                                                                                                                                                                                                                                                                                                                                                                                                                                                | Rwanda                                                                                                                                                                                                                                                                                                                                                                                                                                                                                                                                    | Uganda                                                                                                                                                                                                                                                                                                                                                                                                                                                                                                                                                                                                                            |
|-----------------------------------------------|--------------------------------------------------------------------------------------------------------------------------------------------------------------------------------------------------------------------------------------------------------------------------------------------------------------------------------------------------------------------------------------------------------------------------------------------------------------------------------------------------------------------------------------------------------------------------|-----------------------------------------------------------------------------------------------------------------------------------------------------------------------------------------------------------------------------------------------------------------------------------------------------------------------------------------------------------------------------------------------------------------------------------------------------------------------------------------------------------------------------------------------------------------------------------------------------|-------------------------------------------------------------------------------------------------------------------------------------------------------------------------------------------------------------------------------------------------------------------------------------------------------------------------------------------------------------------------------------------------------------------------------------------------------------------------------------------------------------------------------------------|-----------------------------------------------------------------------------------------------------------------------------------------------------------------------------------------------------------------------------------------------------------------------------------------------------------------------------------------------------------------------------------------------------------------------------------------------------------------------------------------------------------------------------------------------------------------------------------------------------------------------------------|
|                                               | <ul style="list-style-type: none"> <li>• Measures to encourage follow-up:               <ul style="list-style-type: none"> <li>None</li> <li>✓ Providing follow-up dates</li> <li>✓ Importance of follow-up (e.g. vaccinations, growth monitoring)</li> <li>✓ Notes in baby's health passport</li> <li>✓ Good relationship of staff with mothers</li> <li>✓ Praise for good care</li> <li>✓ Threat tactics (1)</li> <li>✓ Incentives (e.g. baby hats)</li> <li>✓ Free hospital stay and follow-up</li> <li>Phone calls</li> <li>✓ Referral to HSA</li> </ul> </li> </ul> | <ul style="list-style-type: none"> <li>• Measures to encourage follow-up:               <ul style="list-style-type: none"> <li>None</li> <li>Providing follow-up dates</li> <li>✓ Importance of follow-up (e.g. vaccinations, growth monitoring) (6)</li> <li>Notes in baby's health passport</li> <li>Good relationship of staff with mothers</li> <li>Praise for good care</li> <li>Threat tactics</li> <li>✓ Incentives (e.g. KMC pouch)</li> <li>✓ Free hospital stay and follow-up</li> <li>✓ Phone calls (to defaulters)</li> <li>Referral to community health workers</li> </ul> </li> </ul> | <ul style="list-style-type: none"> <li>• Measures to encourage follow-up:               <ul style="list-style-type: none"> <li>None</li> <li>Providing follow-up dates</li> <li>✓ Importance of follow-up (e.g. vaccinations, growth monitoring)</li> <li>Notes in baby's health passport</li> <li>Good relationship of staff with mothers</li> <li>Praise for good care</li> <li>Threat tactics</li> <li>Incentives</li> <li>Free hospital stay and follow-up</li> <li>Phone calls</li> <li>✓ Referral to ASM (2)</li> </ul> </li> </ul> | <ul style="list-style-type: none"> <li>• Measures to encourage follow-up:               <ul style="list-style-type: none"> <li>✓ None</li> <li>✓ Providing follow-up dates</li> <li>Importance of follow-up (e.g. vaccinations, growth monitoring)</li> <li>Notes in baby's health passport</li> <li>Good relationship of staff with mothers</li> <li>Praise for good care</li> <li>Threat tactics</li> <li>Incentives (e.g. baby hats)</li> <li>Free hospital stay and follow-up</li> <li>✓ Phone calls (from mothers)</li> <li>Referral to community health workers</li> <li>Know they will see hospital</li> </ul> </li> </ul> |
| Client satisfaction (not focus of evaluation) | <ul style="list-style-type: none"> <li>• Not probed</li> </ul>                                                                                                                                                                                                                                                                                                                                                                                                                                                                                                           | <ul style="list-style-type: none"> <li>• Not probed</li> </ul>                                                                                                                                                                                                                                                                                                                                                                                                                                                                                                                                      | <ul style="list-style-type: none"> <li>• Not probed</li> </ul>                                                                                                                                                                                                                                                                                                                                                                                                                                                                            | <ul style="list-style-type: none"> <li>• Not probed</li> <li>• One private-not-for-profit hospital had a book where clients could write comments on their KMC experience</li> </ul>                                                                                                                                                                                                                                                                                                                                                                                                                                               |

| Topic                                           | Malawi                                                                                                                                                                                                                                                                                                                                                                                      | Mali                                                                                                                                                                                         | Rwanda                                                                                                                                                                             | Uganda                                                                                                                                                                                                                                                                                            |
|-------------------------------------------------|---------------------------------------------------------------------------------------------------------------------------------------------------------------------------------------------------------------------------------------------------------------------------------------------------------------------------------------------------------------------------------------------|----------------------------------------------------------------------------------------------------------------------------------------------------------------------------------------------|------------------------------------------------------------------------------------------------------------------------------------------------------------------------------------|---------------------------------------------------------------------------------------------------------------------------------------------------------------------------------------------------------------------------------------------------------------------------------------------------|
| Community involvement (not focus of evaluation) | <ul style="list-style-type: none"> <li>• Training of health surveillance assistants (HSAs) in newborn care</li> <li>• In at least one of the learning districts</li> <br/> <li>• Great variations among districts</li> <li>• Grandmothers as promoters of KMC in at least one district</li> <li>• Advocacy activities and sensitisation of traditional leaders in some districts</li> </ul> | <ul style="list-style-type: none"> <li>• No specific training action directed from the national level</li> <br/> <li>• Some training and sensitisation activities in one district</li> </ul> | <ul style="list-style-type: none"> <li>• Initiation of <i>agents de santé maternelle</i> (ASMs)</li> <li>• KMC part of ASM package</li> <br/> <li>• Not probed in depth</li> </ul> | <ul style="list-style-type: none"> <li>• Eclectic, depending on which districts were targeted for training in newborn care</li> <li>• Uganda Newborn Study (UNEST) in one district linked implementation with research that included community health workers</li> <br/> <li>• Unknown</li> </ul> |
